# Supplementary material for: Copy Number Variation of Transposable Elements in Thinopyrum intermedium and Its Diploid Relative Species
Source: MDPI journal article supplement (doi:10.3390/plants9010015), 2019-12-21
Supplement: s1 [file s1]

*Geneva (Ty3/Gypsy)*

*WIS-A (Ty1/Copia)*

*VRN1*

*P. spicata* (St)

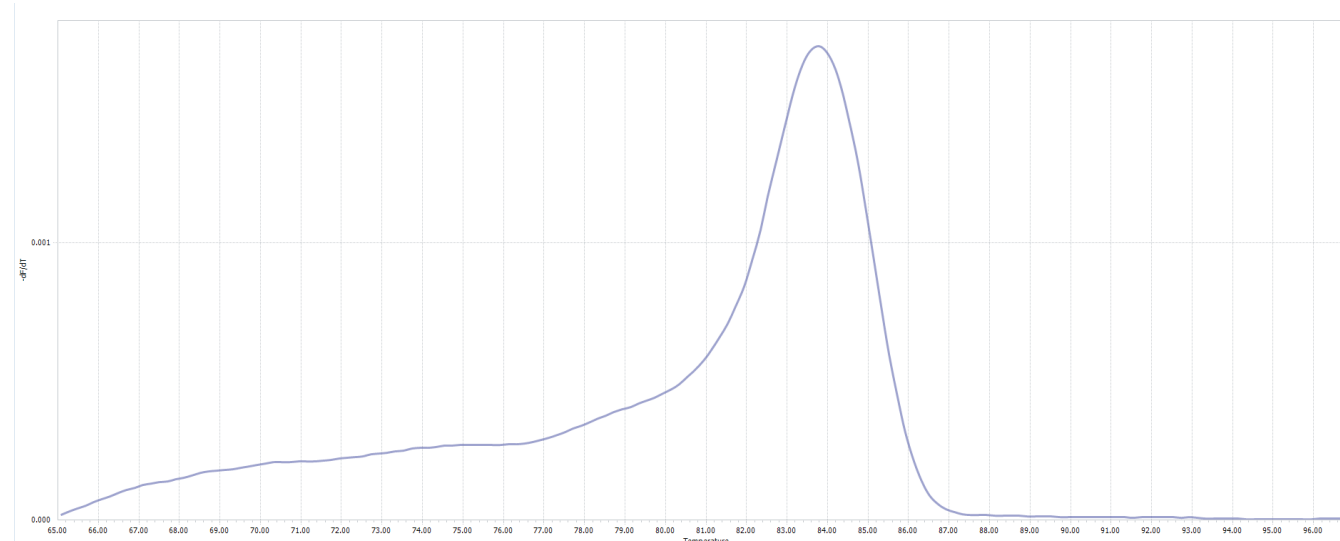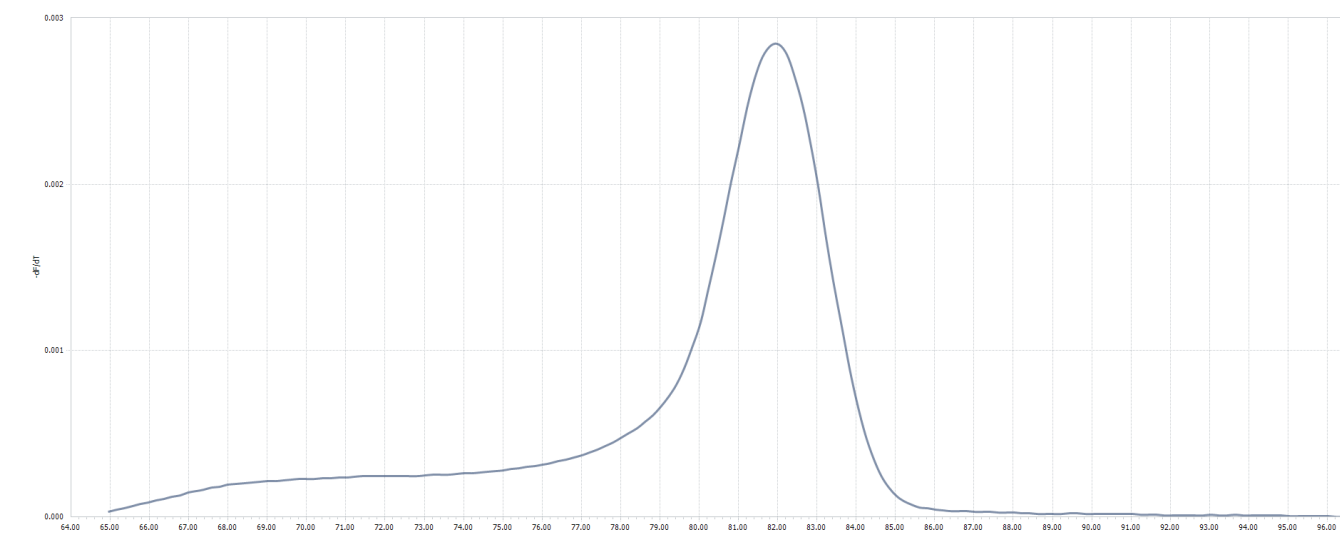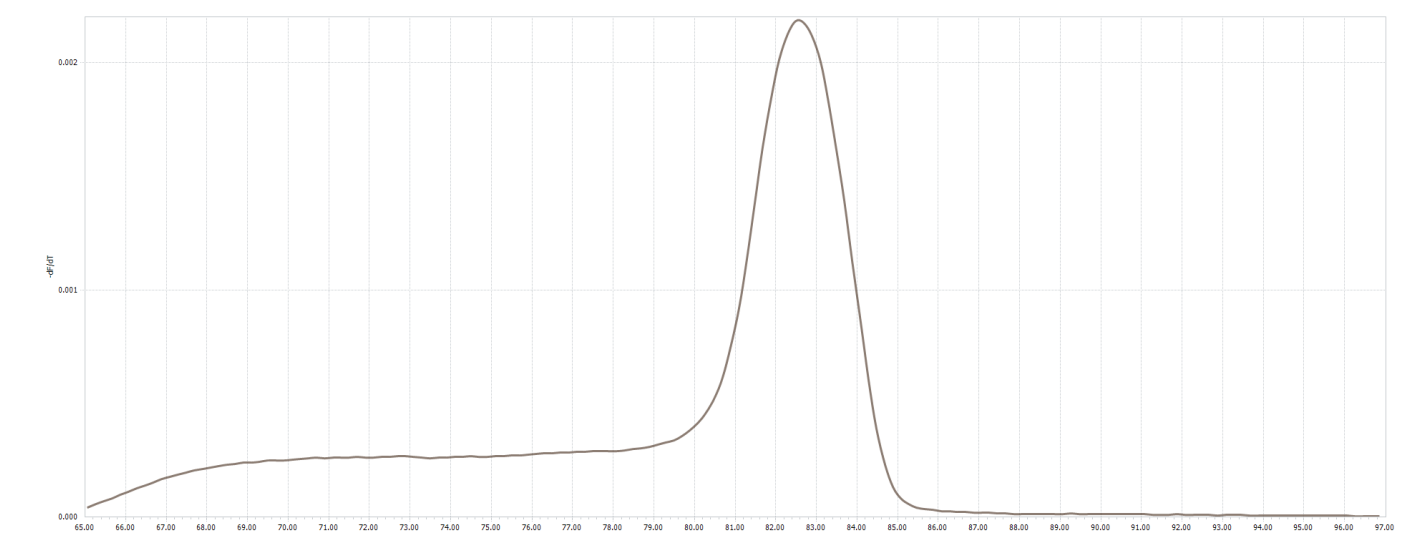

*Th. bessarabicum* (J<sup>b</sup>)

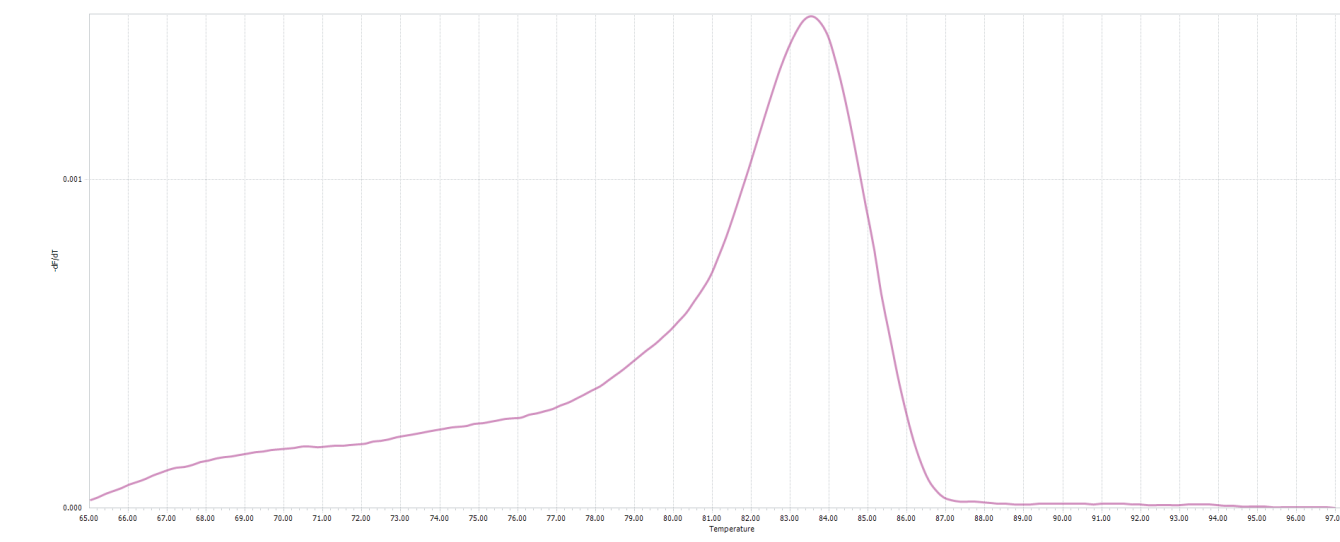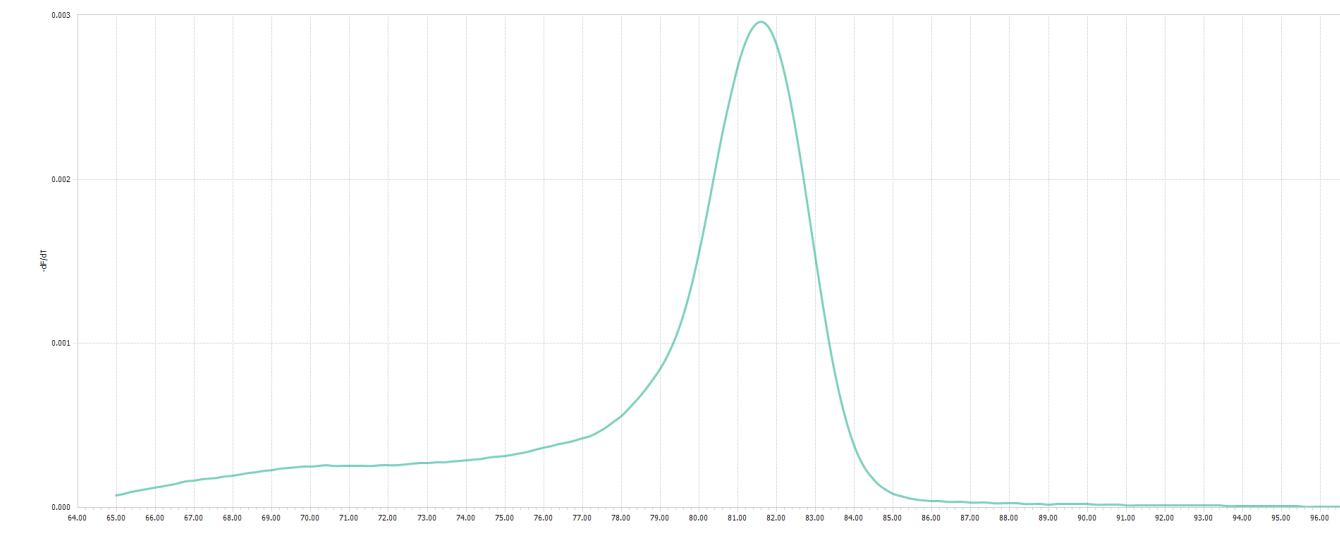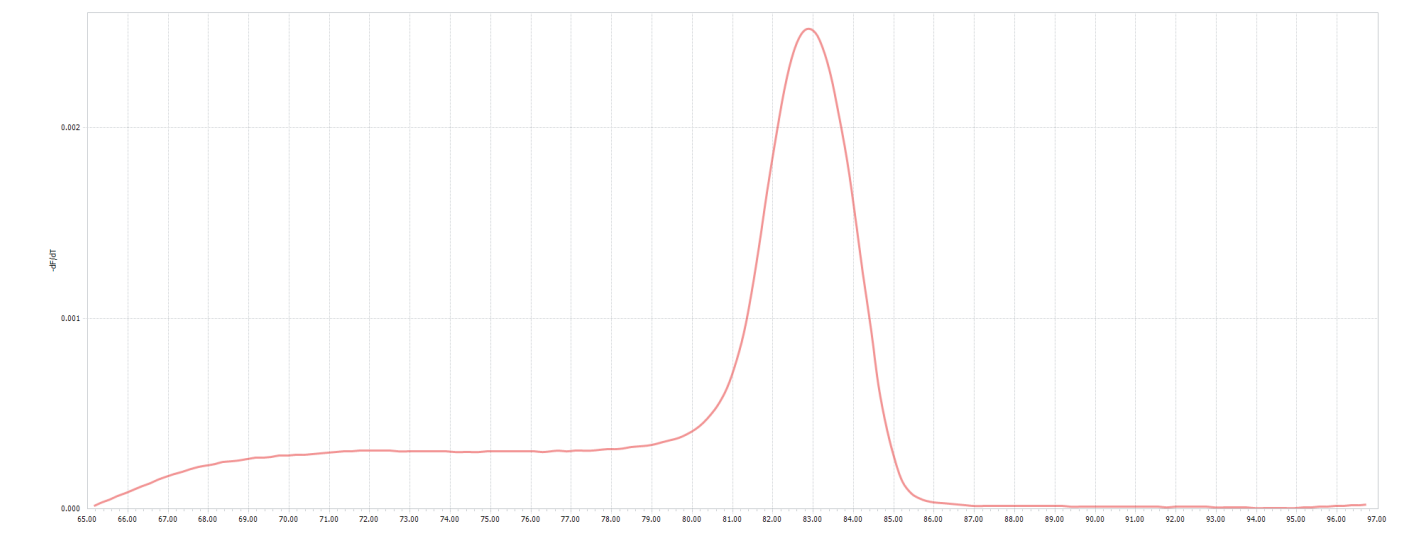

*D. villosum* (V)

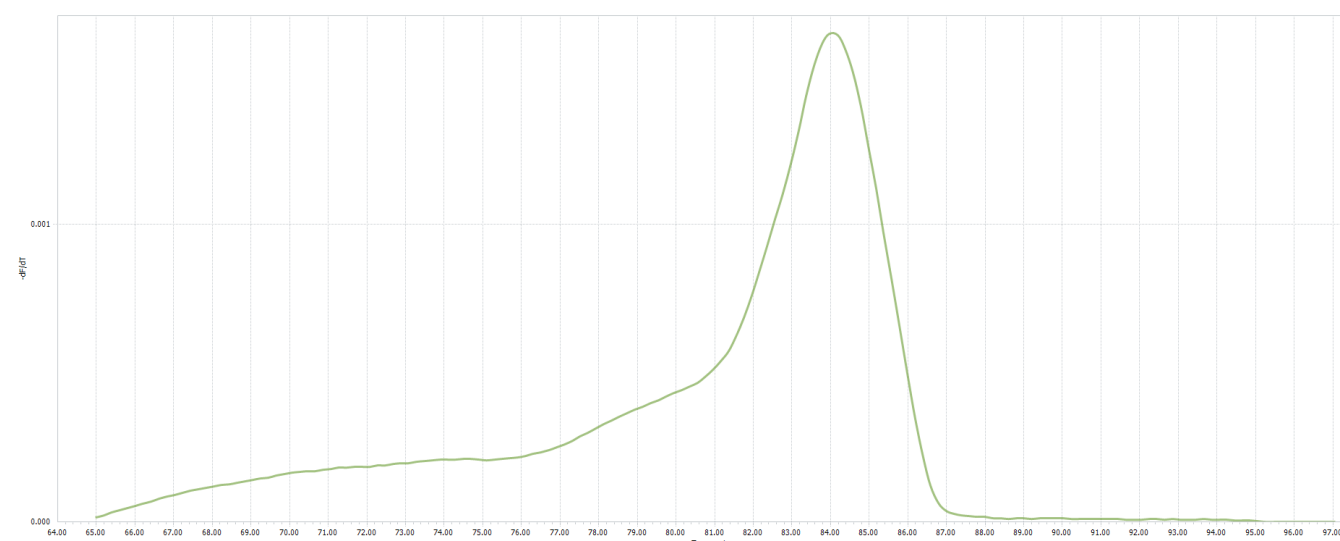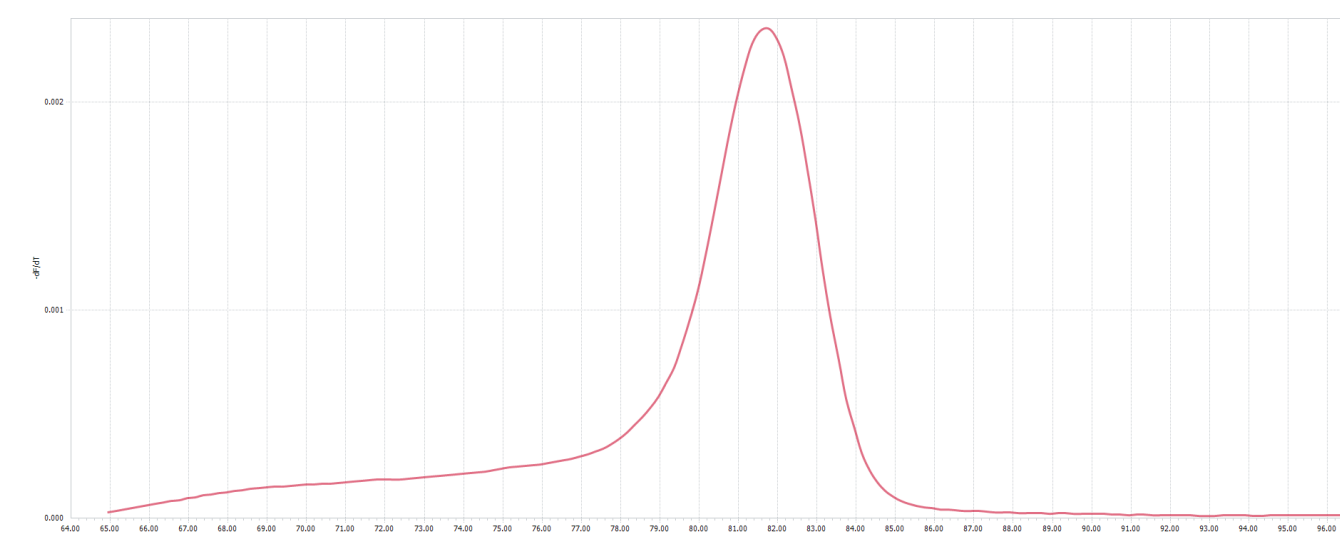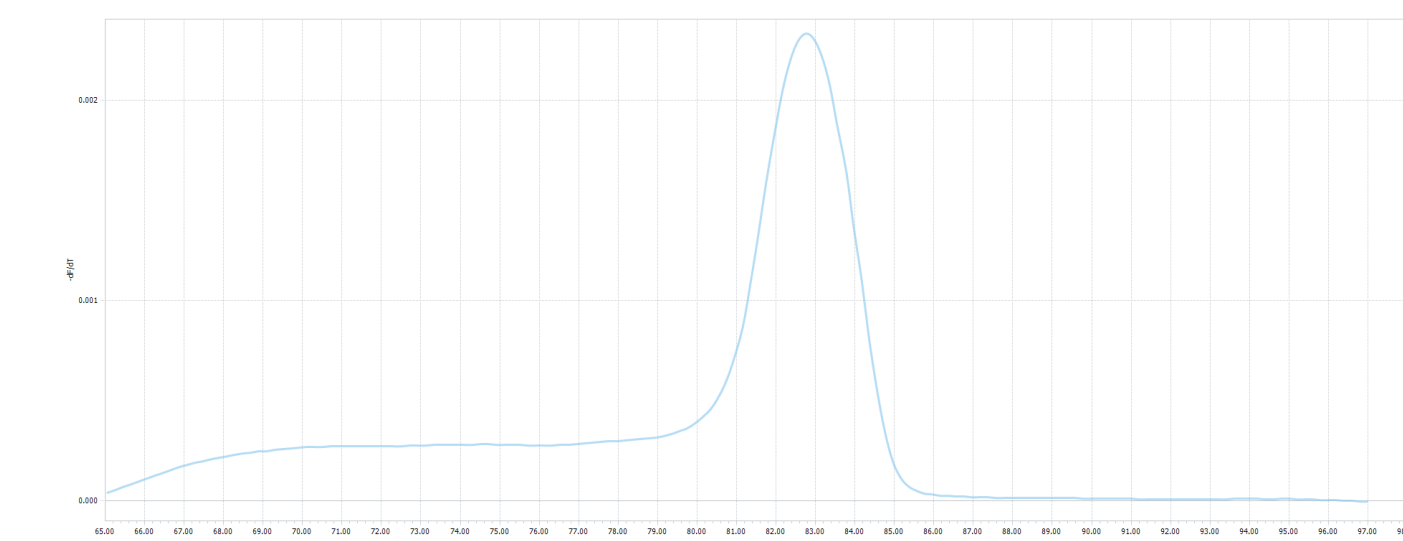

*Ae. tauschii* (D)

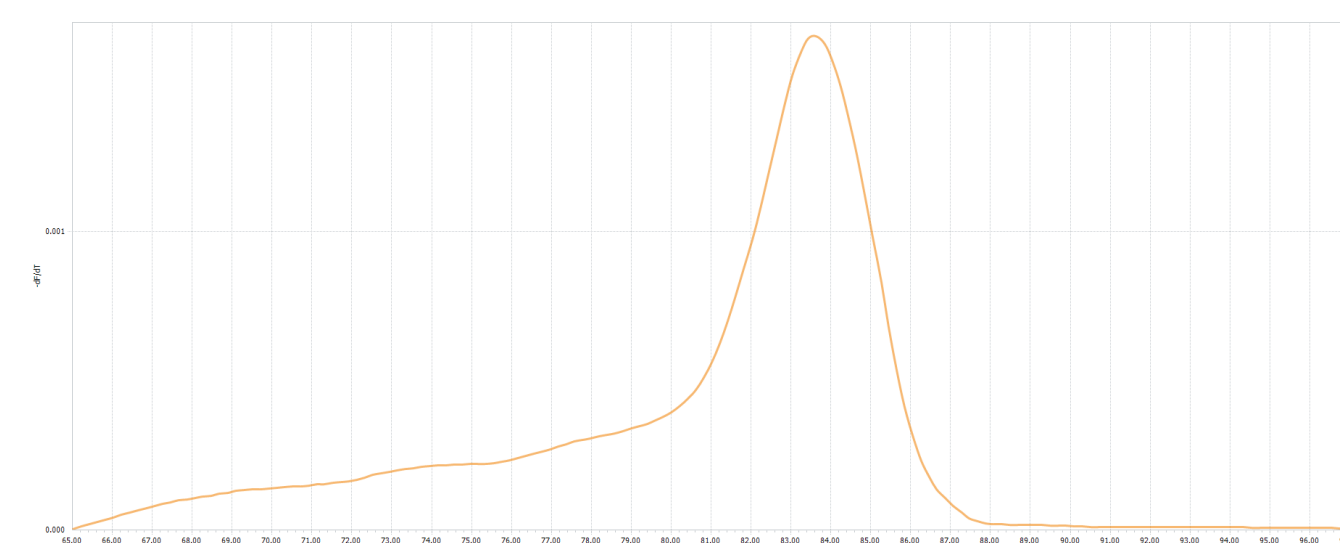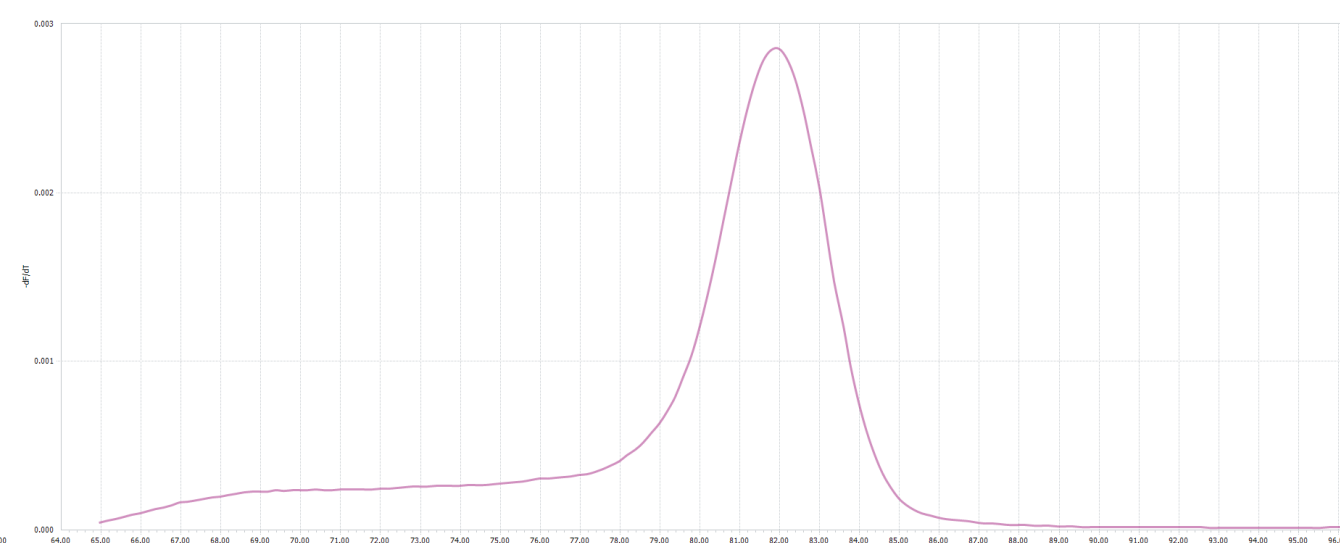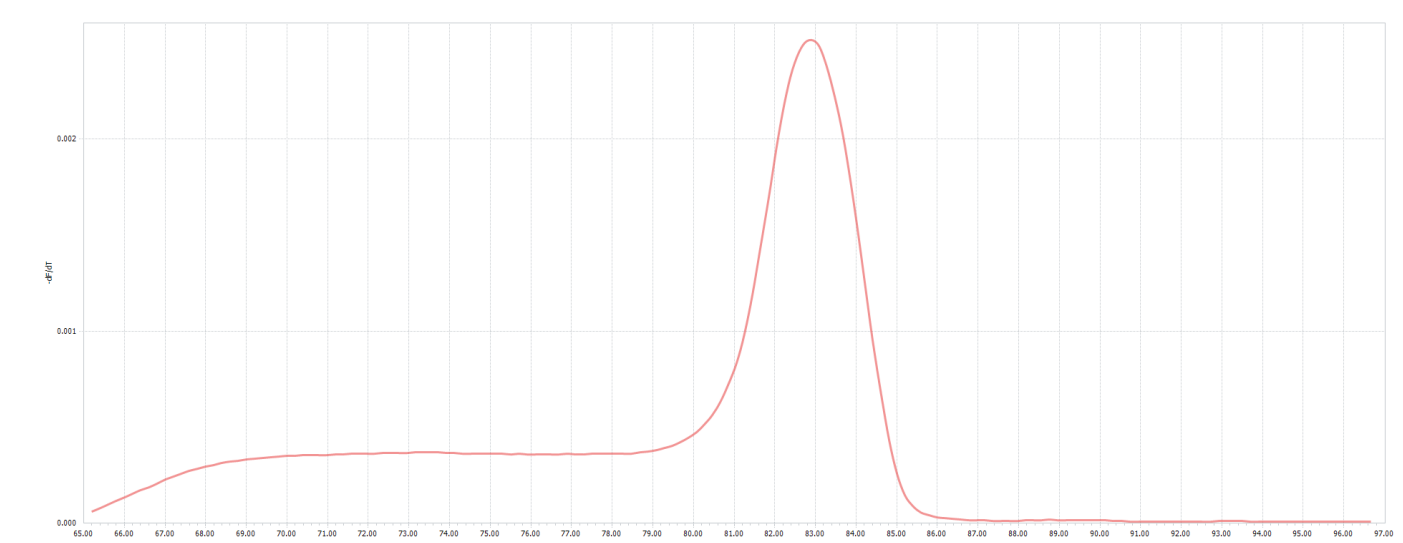

**Figure S1.** Examples of melting curves for the fragments amplified in qPCR using primers for *Geneva*, *WIS-A*, and *VRN1* (as a reference gene) in *P. spicata*, *Th. bessarabicum*, *D. villosum*, and *Ae. tauschii*.
