# Supplementary material for: Copy Number Variation of Transposable Elements in Thinopyrum intermedium and Its Diploid Relative Species
Source: MDPI journal article supplement (doi:10.3390/plants9010015), 2019-12-21
Supplement: s1 [file s1]

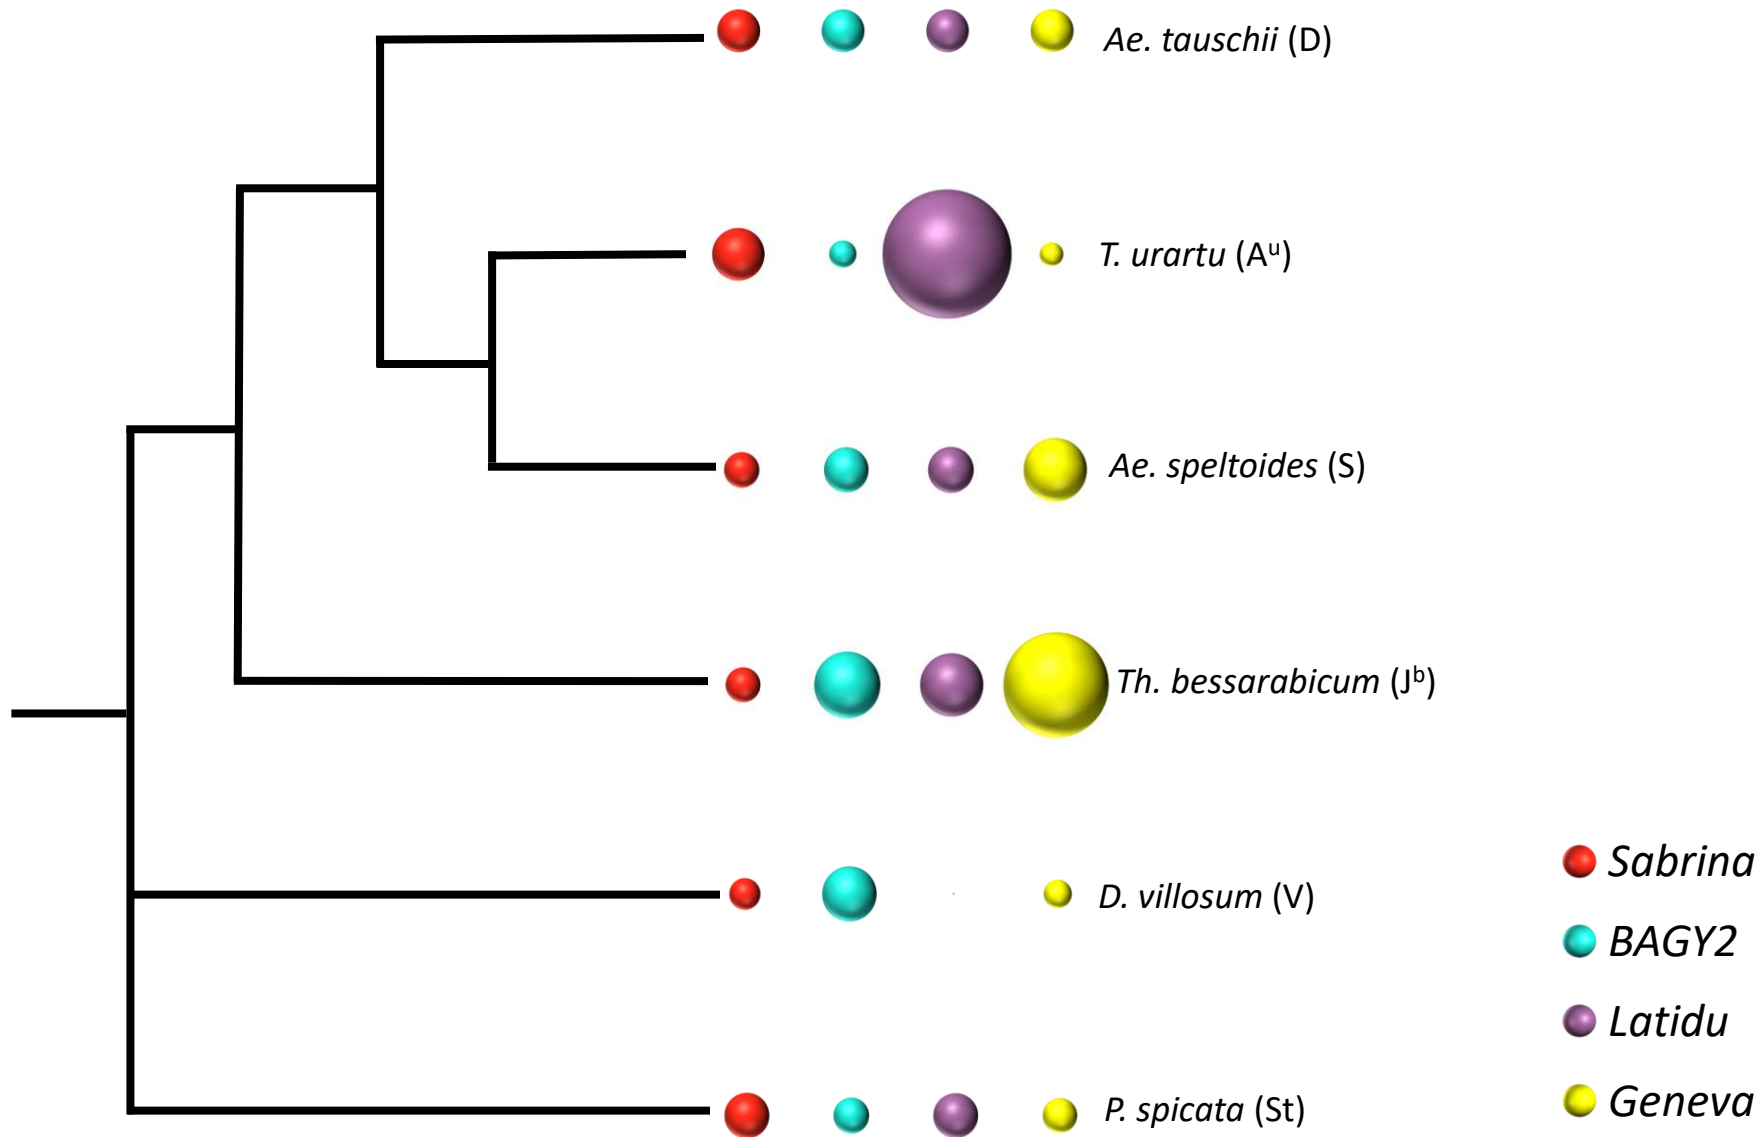

**Figure S9.** Normalized relative quantity (NRQ, compared to *Ae. tauschii* (D), set as 1, see text) of Gypsy LTR retrotransposons in the following species: *T. urartu* (A<sup>u</sup>), *Ae. speltoides* (S), *Ae. tauschii* (D) (Yaakov et al., 2013); *P. spicata* (St), *Th. bessarabicum* (J<sup>b</sup>), *D. villosum* (V). The area of the circle is equal to the NRQ of each transposable element.

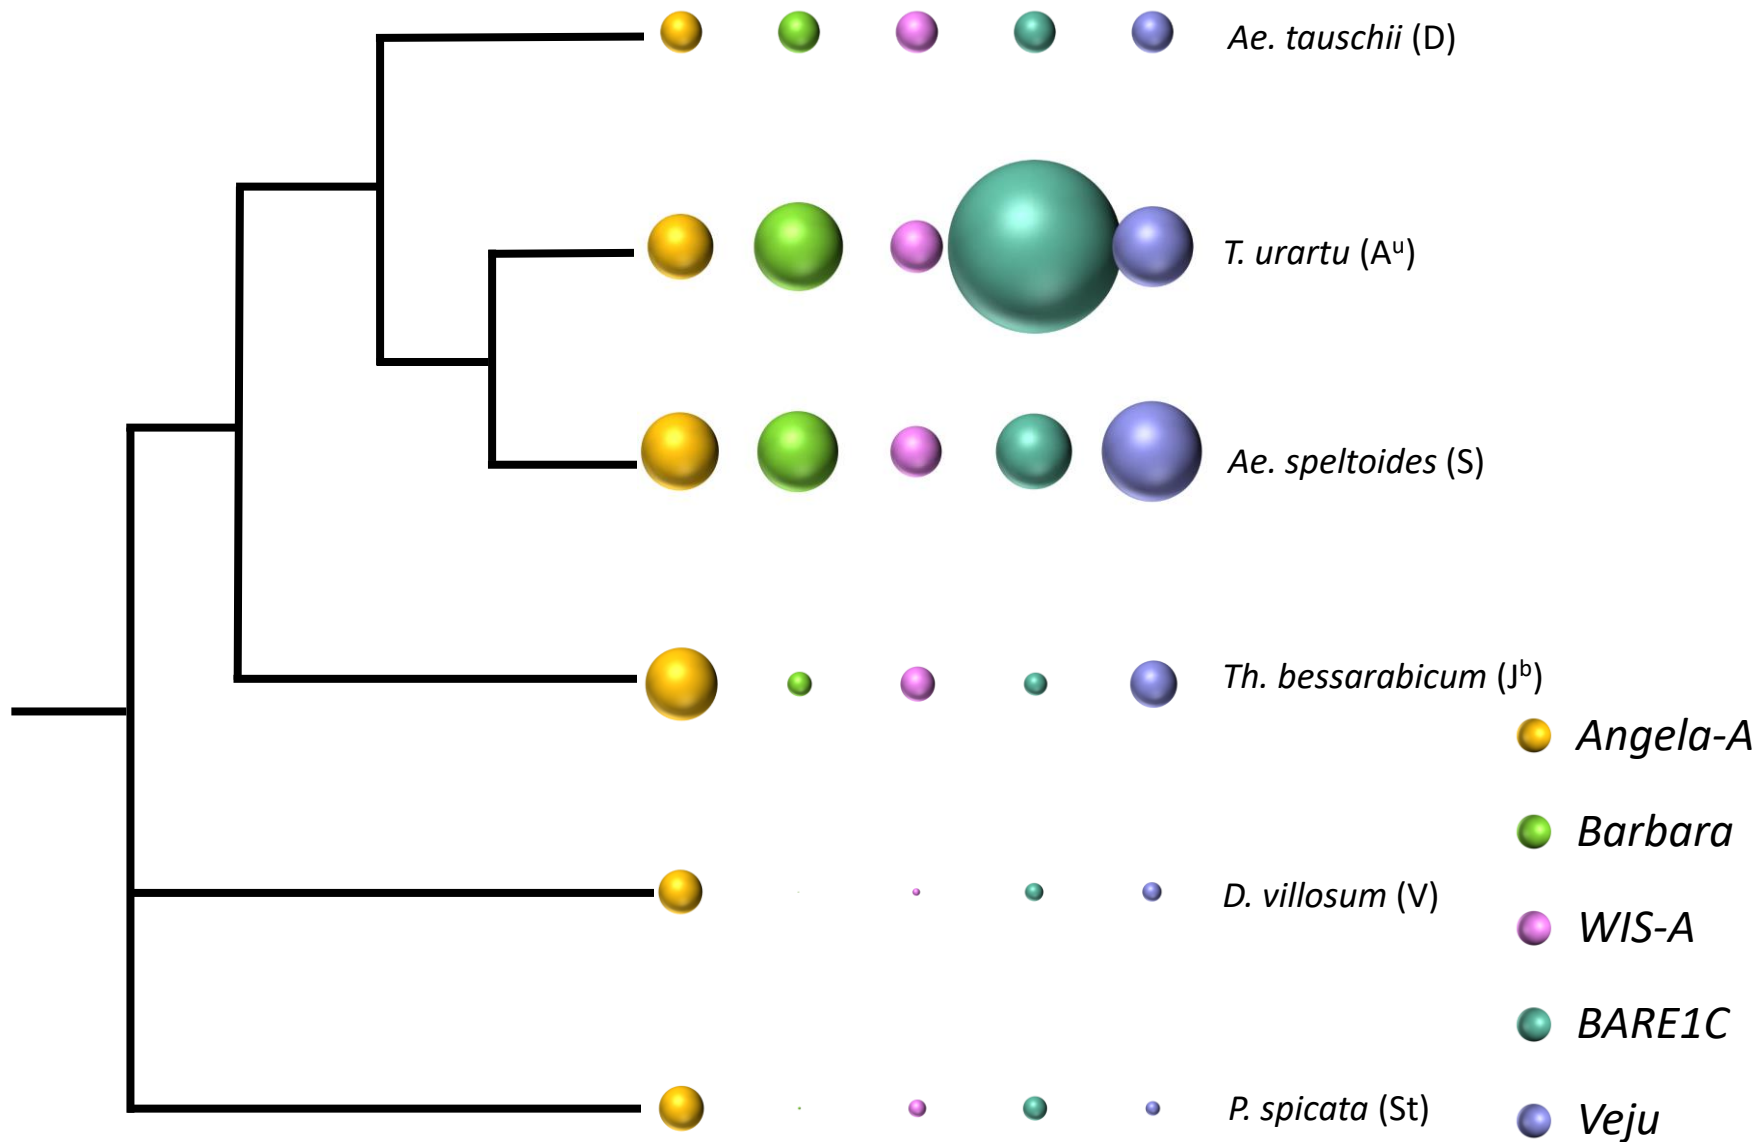

**Figure S10.** Normalized relative quantity (NRQ, compared to *Ae. tauschii* (D), set as 1, see text) of *Copia* LTR retrotransposons in the following species: *T. urartu* (A<sup>u</sup>), *Ae. speltoides* (S), *Ae. tauschii* (D) (Yaakov et al., 2013); *P. spicata* (St), *Th. bessarabicum* (J<sup>b</sup>), *D. villosum* (V). The area of the circle is equal to the NRQ of each transposable element.

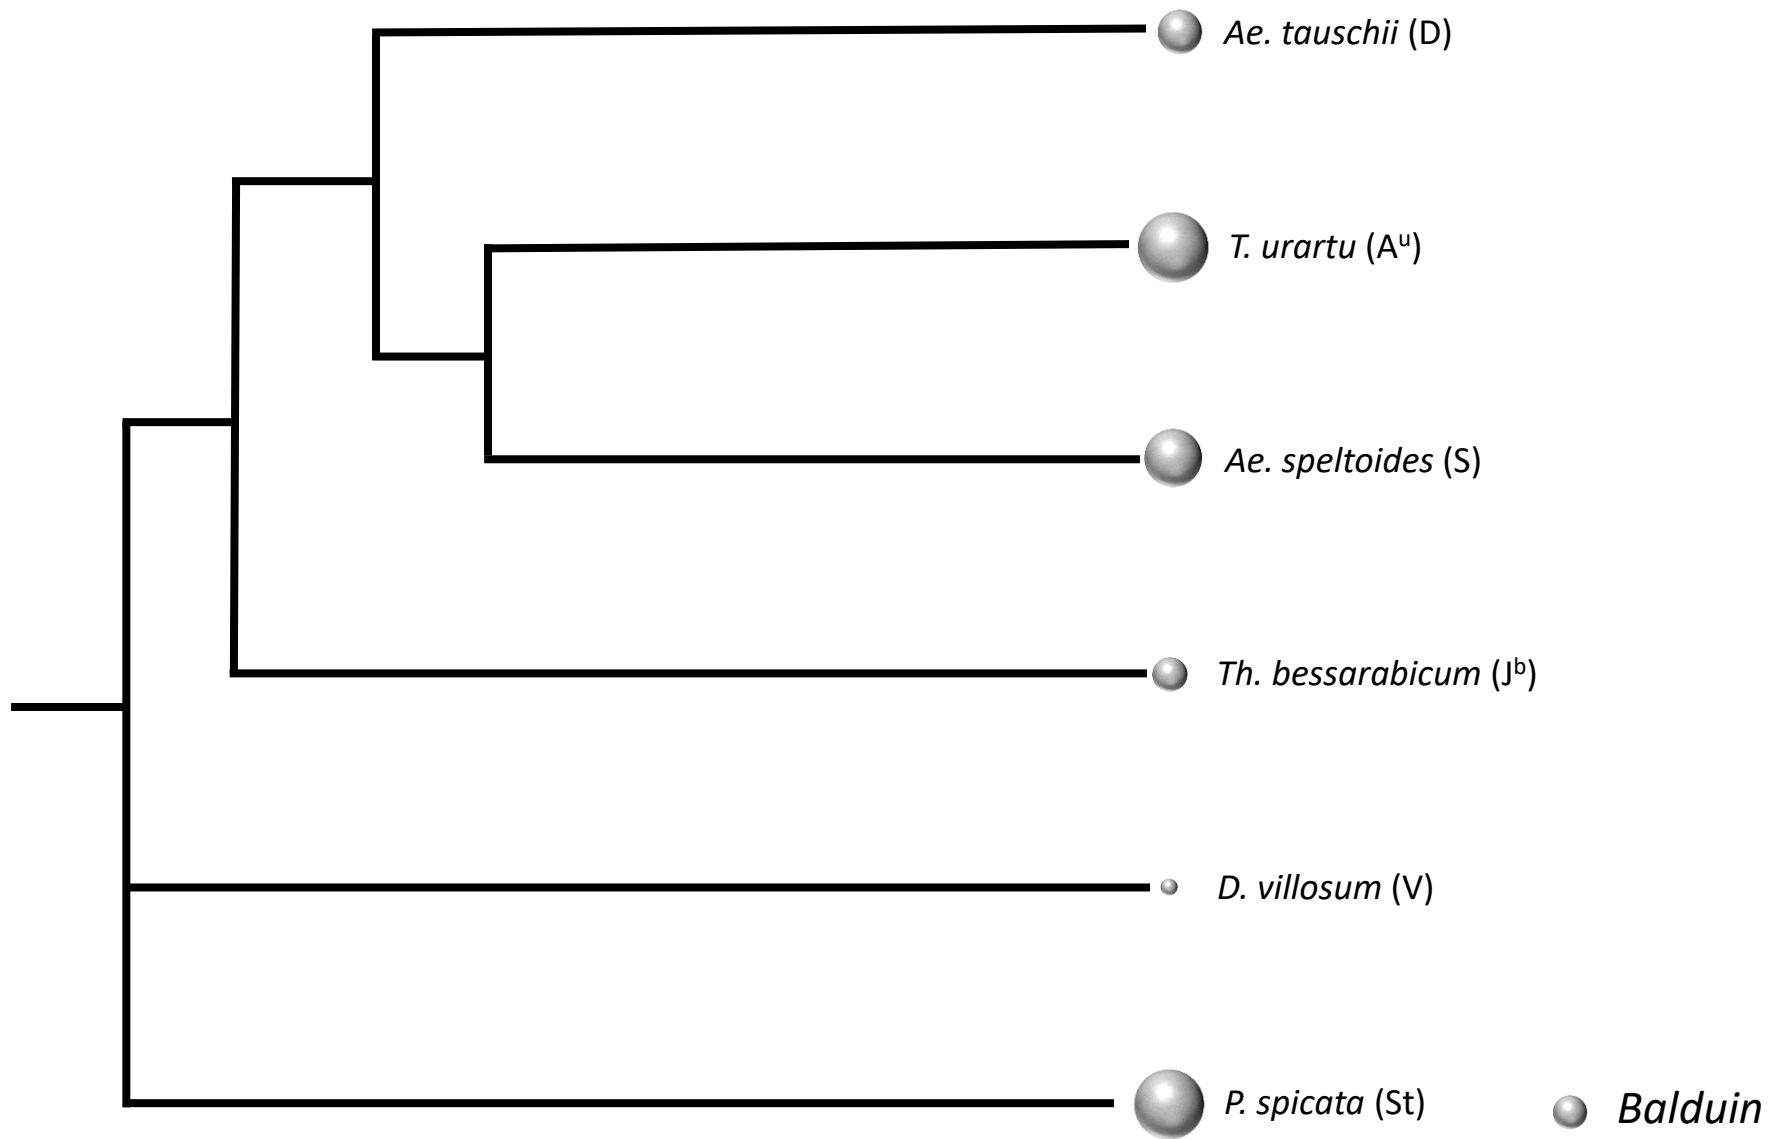

**Figure S11.** Normalized relative quantity (NRQ, compared to *Ae. tauschii* (D), set as 1, see text) of DNA transposon *Balduin* in the following species: *T. urartu* (A<sup>u</sup>), *Ae. speltooides* (S), *Ae. tauschii* (D) (Yaakov et al., 2013); *P. spicata* (St), *Th. bessarabicum* (J<sup>b</sup>), *D. villosum* (V). The area of the circle is equal to the NRQ of each transposable element.

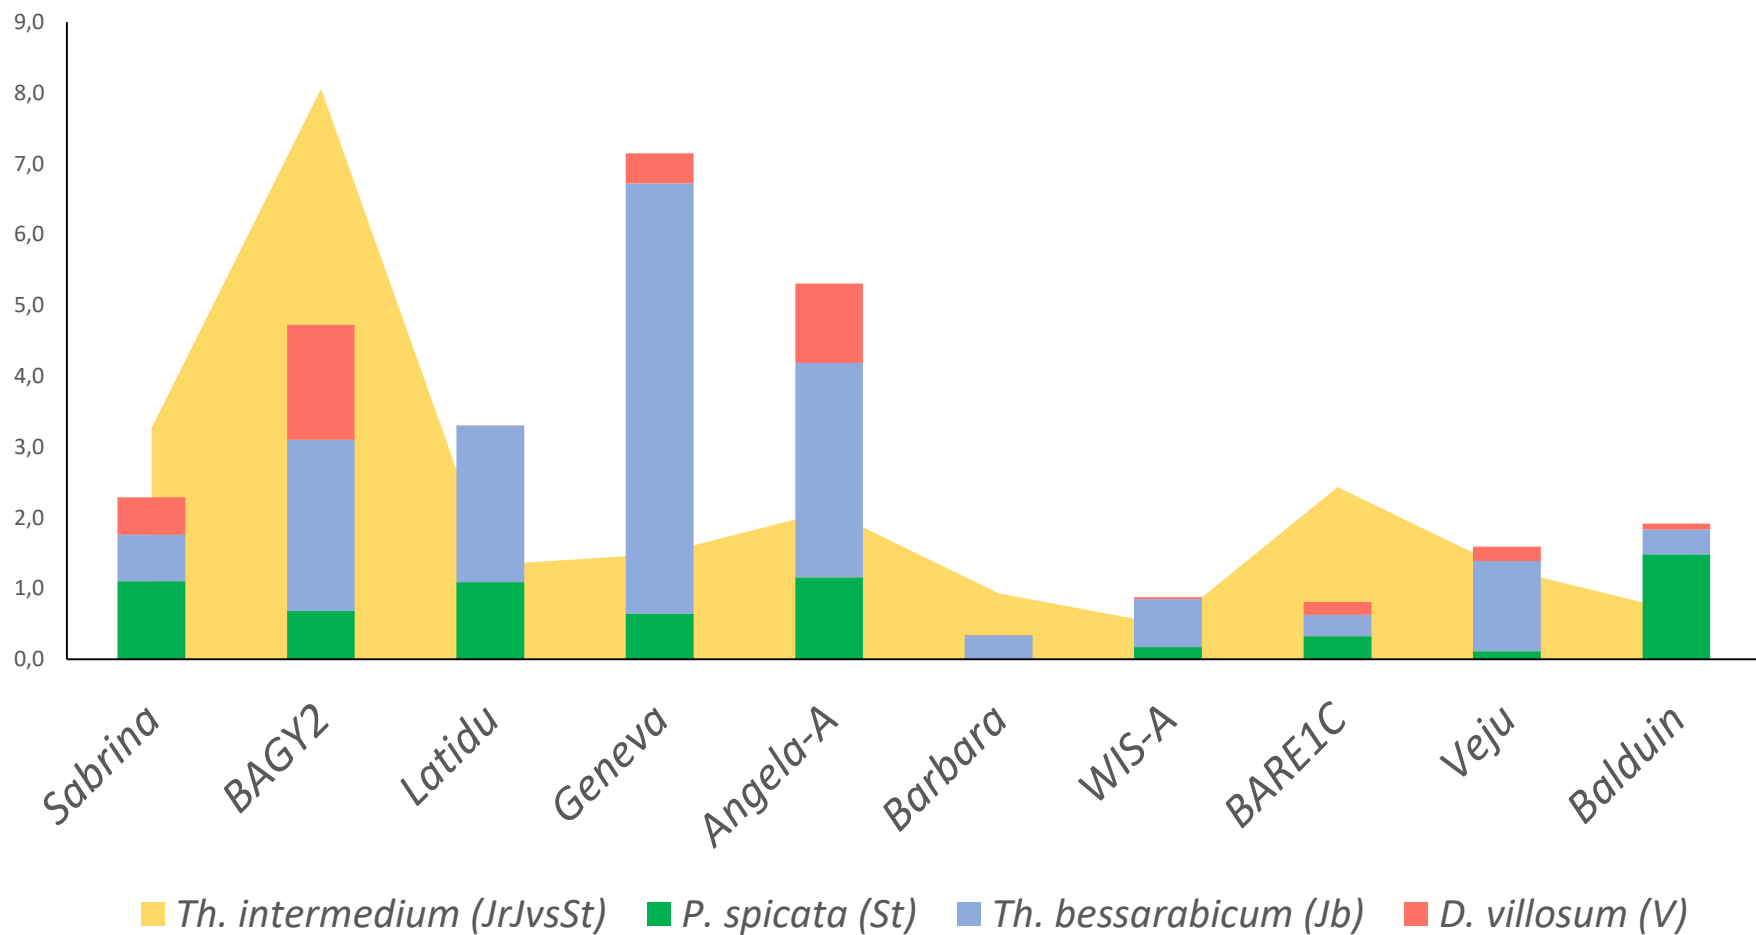

**Figure S12.** Normalized relative quantity (compared to *Ae. tauschii* (D), set as 1, see text) of the studied mobile elements in the following species: *P. spicata* (St), *Th. bessarabicum* (J<sup>b</sup>), *D. villosum* (V), *Th. intermedium* (J<sup>r</sup>J<sup>vs</sup>St, per whole allopolyploid genome).
